# Supplementary material for: A simple one-step method to prepare fluorescent carbon dots and their potential application in non-invasive glioma imaging
Source: Royal Society of Chemistry journal article supplement (doi:10.1039/c4nr02657h), 2014-01-01
Supplement: c4nr02657h1.pdf [file c4nr02657h1.pdf]

## Supporting Information

### A simple one-step method to prepare fluorescent carbon dots and their potential application in non-invasive glioma imaging

Shaobo Ruan<sup>a,1</sup>, Jun Qian<sup>b,1</sup>, Shun Shen<sup>b</sup>, Jianhua Zhu<sup>b</sup>, Xinguo Jiang<sup>b</sup>, Qin He<sup>a</sup>, Huile

Gao<sup>a,\*</sup>

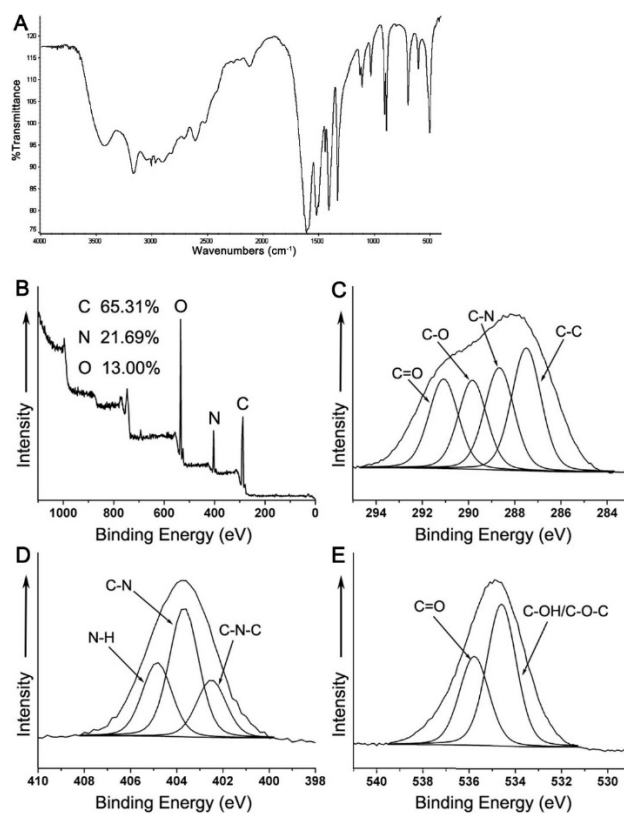

Fig. S1. Characterization of CD. A: FT-IR spectrum of CNP. B: XPS survey spectrum of CNP. C:

XPS C<sub>1s</sub> spectrum of CNP. D: XPS N<sub>1s</sub> spectrum of CNP. E: XPS O<sub>1s</sub> spectrum of CNP.

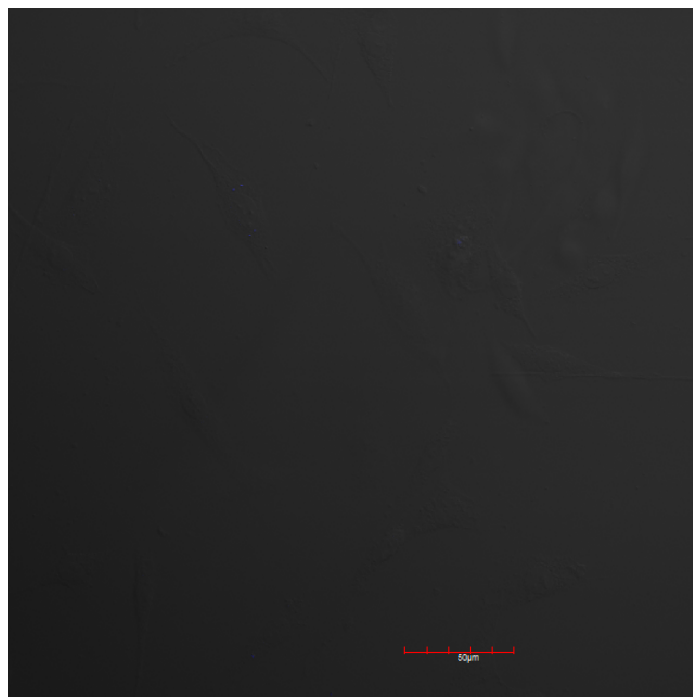

Fig. S2. Merge image of C6 cells (without CDs treatment) captured by confocal microscope using the same channels as described in cellular uptake. Bar represents 50  $\mu\text{m}$ .
